# Supplementary material for: Declining runoff sensitivity to precipitation following permafrost degradation: Insights from event-scale runoff response in the Yellow River source region
Source: Copernicus journal article supplement (doi:10.5194/egusphere-2025-3018), 2025-08-06
Supplement: Supplementary file 1 [file egusphere-2025-3018-supplement.pdf]

## **Supplementary Materials for**

### **Declining runoff sensitivity to precipitation following permafrost degradation: Insights from event-scale runoff response in the Yellow River source region**

Zhuoyi Tu<sup>1</sup>, Taihua Wang<sup>2,3</sup>, Juntai Han<sup>2,3</sup>, Hansjörg Seybold<sup>4</sup>, Shaozhen Liu<sup>4</sup>, Cansu Culha<sup>4,5</sup>, Yuting Yang<sup>2,3\*</sup>, James W. Kirchner<sup>4,6\*</sup>

<sup>1</sup> Jiangsu Key Laboratory of Soil and Water Processes in Watershed, College of Geography and Remote Sensing, Hohai University, Nanjing, China.

<sup>2</sup> State Key Laboratory of Hydrosience and Engineering, Tsinghua University, Beijing, China.

<sup>3</sup> Department of Hydraulic Engineering, Tsinghua University, Beijing, China.

<sup>4</sup> Department of Environmental System Sciences, ETH Zurich, Zurich, Switzerland

<sup>5</sup> Department of Earth, Ocean and Atmospheric Sciences, University of British Columbia, Vancouver, Canada

<sup>6</sup> Swiss Federal Research Institute WSL, Birmensdorf, Switzerland

Corresponding author: Yuting Yang (yuting\_yang@tsinghua.edu.cn), James Kirchner (kirchner@env.ethz.ch)

This document contains: Figures S1-S3, Tables S1

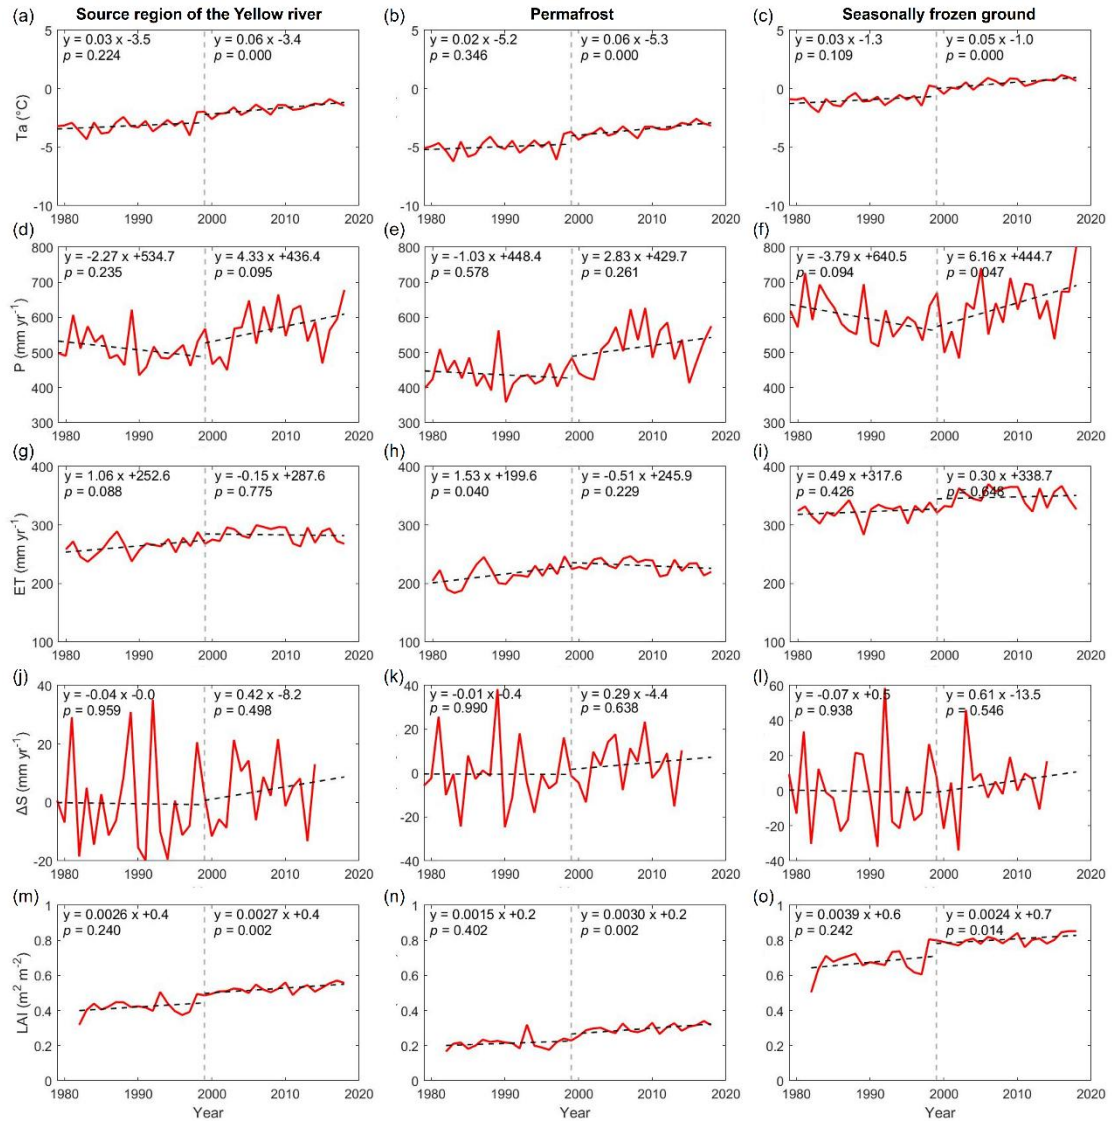

**Figure S1.** Time series of annual averages for (a–c) air temperature, (d–f) precipitation, (g–i) evapotranspiration, (j–l) the water storage change, and (m–o) leaf area index (LAI) across the entire Source Region of the Yellow River, the permafrost region, and the seasonally frozen ground region. Dashed black lines represent trends for the periods 1979–1998 and 1999–2018.

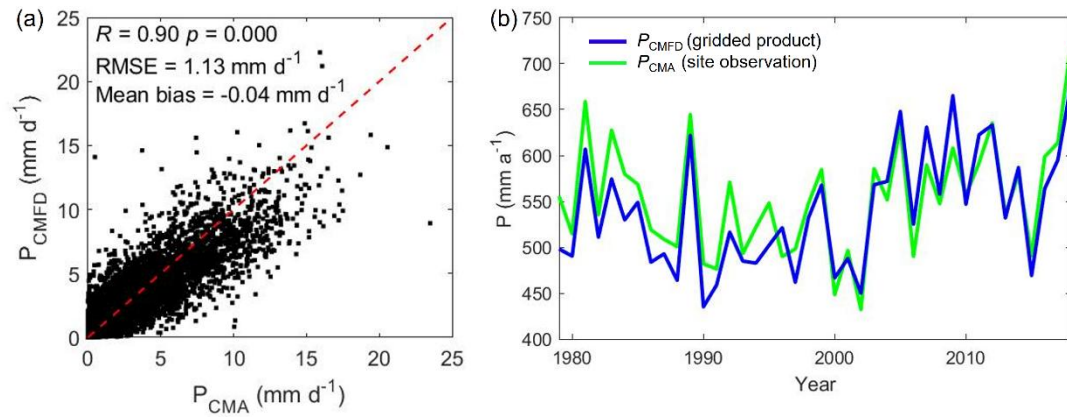

**Figure S2.** Comparison of (a) daily and (b) annual precipitation values between the mean of 11 meteorological stations (CMA) and the spatial mean precipitation from gridded data (CMFD). The dashed red line represents the 1:1 line.

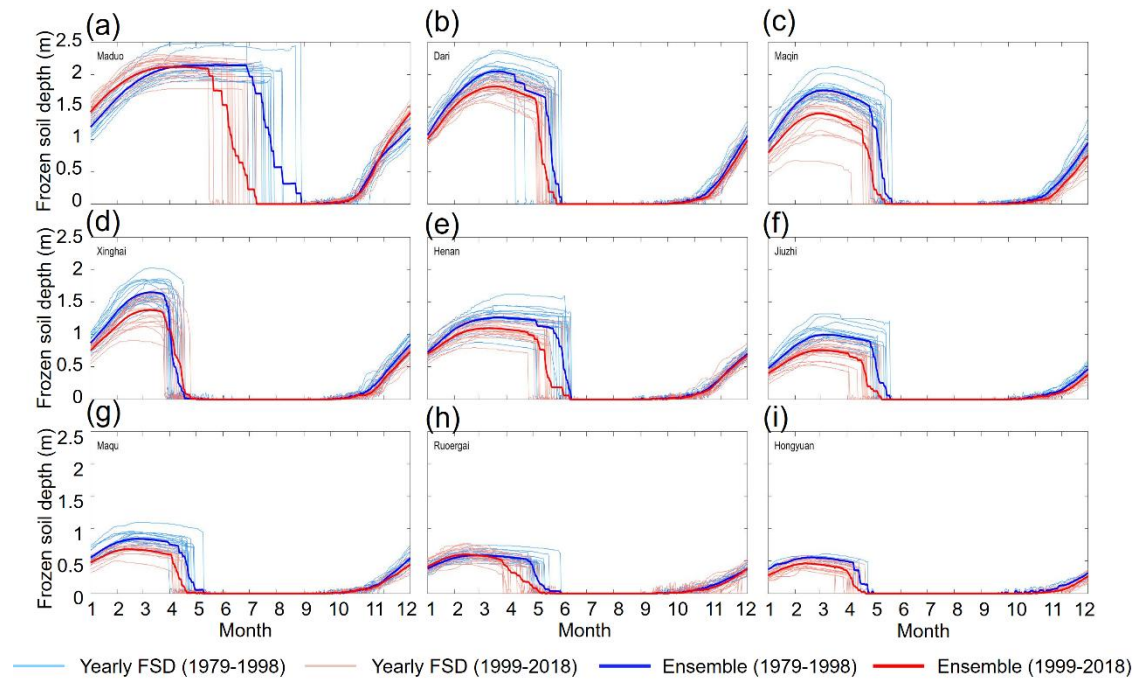

**Figure S3.** Observed frozen soil depths (FSD) at 9 meteorological stations. Panels (a–d) represent stations Maduo, Dari, Maqin and Xinghai, located in the permafrost region, while panels (e–i) depict stations Henan, Jiuzhi, Maqu, Ruergai and Hongyuan, situated in areas with seasonally frozen ground. Blue lines represent annual FSD during the period 1979–1998, with the bold blue line indicating the mean FSD over these 20 years. Similarly, red lines represent annual FSD during 1999–2018, with the bold red line indicating the corresponding 20-year mean.

**Table S1.** Basic information for the 11 meteorological stations provided by the China Meteorological Administration (CMA), including station name, geographic coordinates (latitude and longitude), elevation, and frozen ground type.

| No | Name     | Latitude<br>(°N) | Longitude<br>(°E) | Elevation<br>(m) | Frozen ground type        |
|----|----------|------------------|-------------------|------------------|---------------------------|
| 1  | Maduo    | 34.92            | 98.22             | 4272.3           | Permafrost                |
| 2  | Dari     | 33.75            | 99.65             | 3967.5           | Permafrost                |
| 3  | Maqin    | 34.48            | 100.23            | 3719.0           | Permafrost                |
| 4  | Xinghai  | 35.58            | 99.98             | 3323.2           | Permafrost                |
| 5  | Henan    | 34.73            | 101.60            | 3500.0           | Seasonally frozen ground  |
| 6  | Jiuzhi   | 33.43            | 101.48            | 3628.5           | Seasonally frozen ground  |
| 7  | Maqu     | 34.00            | 102.08            | 3471.4           | Seasonally frozen ground  |
| 8  | Ruoergai | 33.58            | 102.97            | 3441.4           | Seasonally frozen ground  |
| 9  | Hongyuan | 32.80            | 102.55            | 3491.6           | Seasonally frozen ground  |
| 10 | Tongde   | 35.25            | 100.60            | 3080.0           | No frozen soil depth data |
| 11 | Zeku     | 35.03            | 101.47            | 3662.8           | No frozen soil depth data |
